# Supplementary material for: Interpretable Multiple Instance Learning for Hematologic Diagnosis from Peripheral Blood Smears
Source: Research Square preprint supplement (doi:10.21203/rs.3.rs-6933141/v1), 2025-10-31
Supplement: Supplementary file 1 [file e288350bf7ab4721e5af7627.pdf]

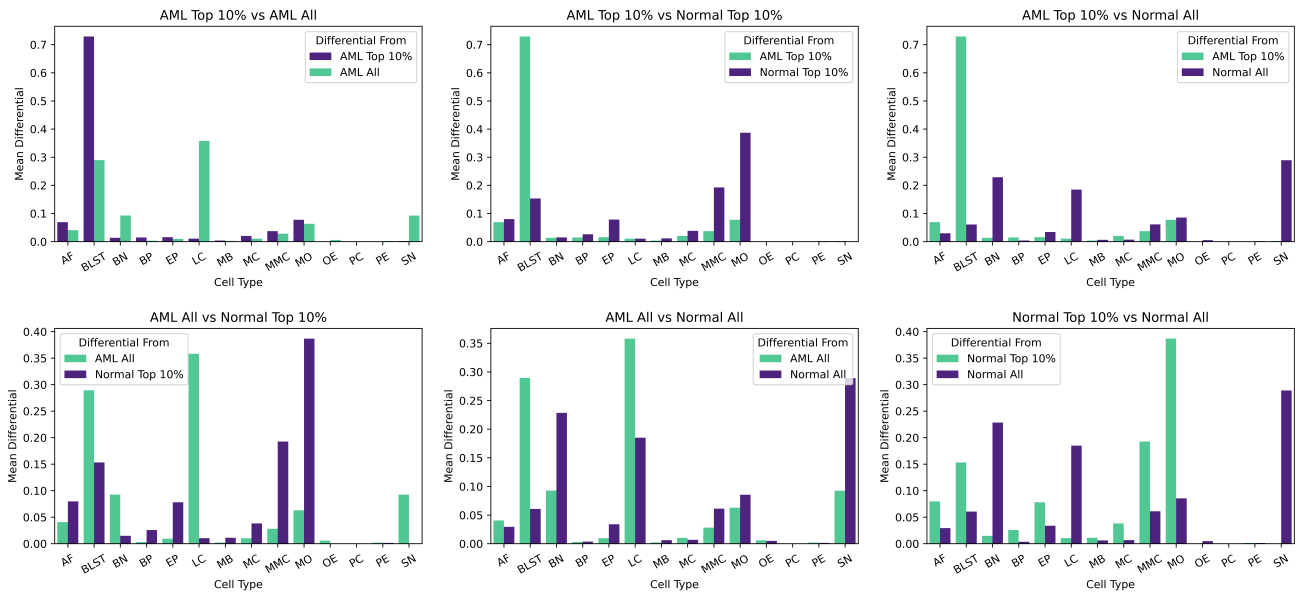

**Figure Supplementary 1. Comparative attention barplots** In each bar plot we are comparing the mean differentials of the patients taken just from the top 10% attention cells vs all the cells.

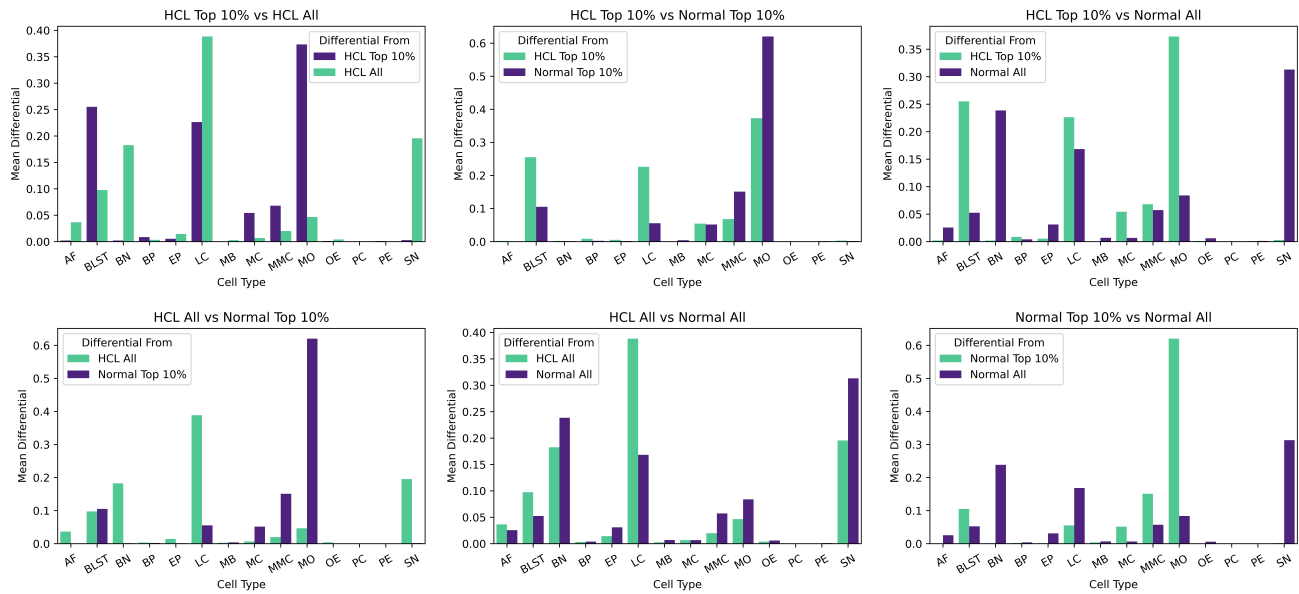

**Figure Supplementary 2. Comparative attention barplots** In each bar plot we are comparing the mean differentials of the patients taken just from the top 10% attention cells vs all the cells.

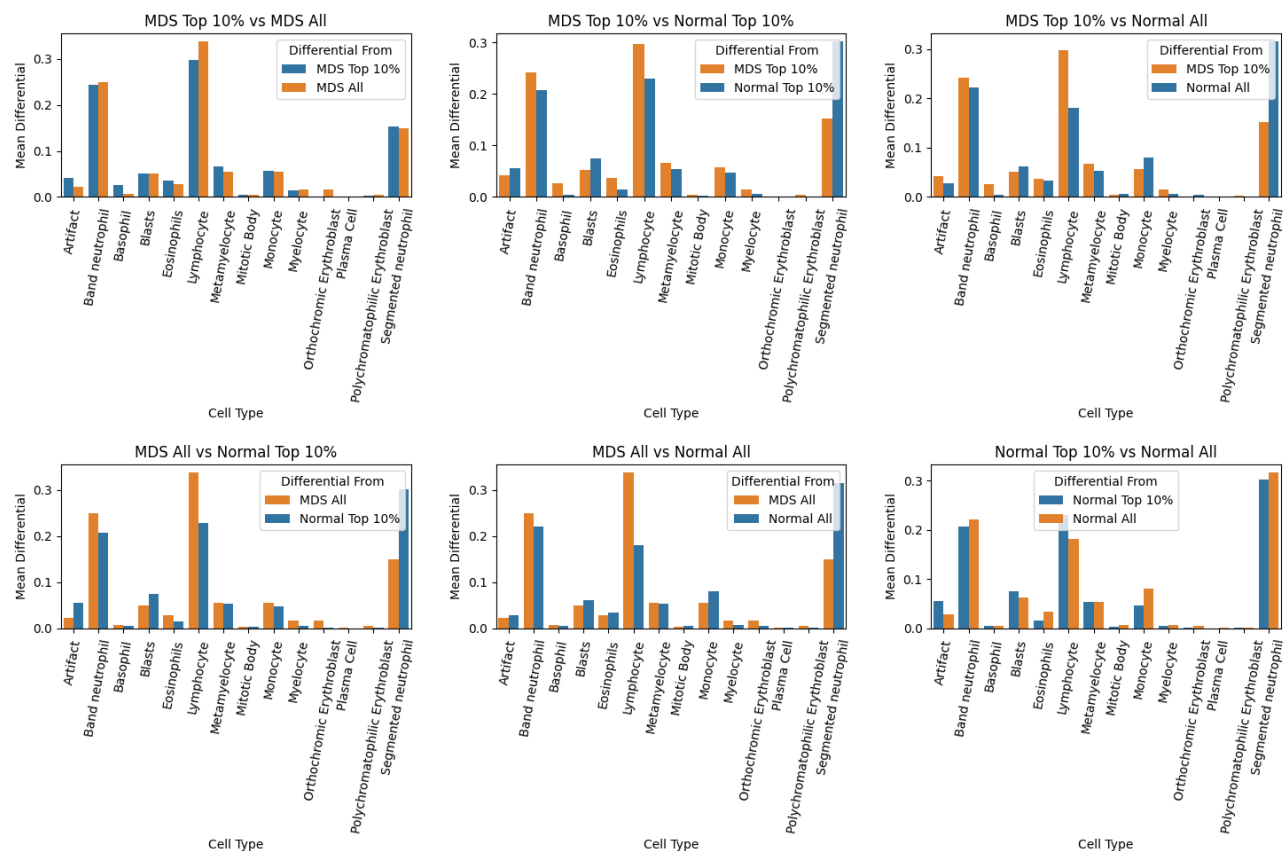

**Figure Supplementary 3. Comparative attention barplots** In each bar plot we are comparing the mean differentials of the patients taken just from the top 10% attention cells vs all the cells.

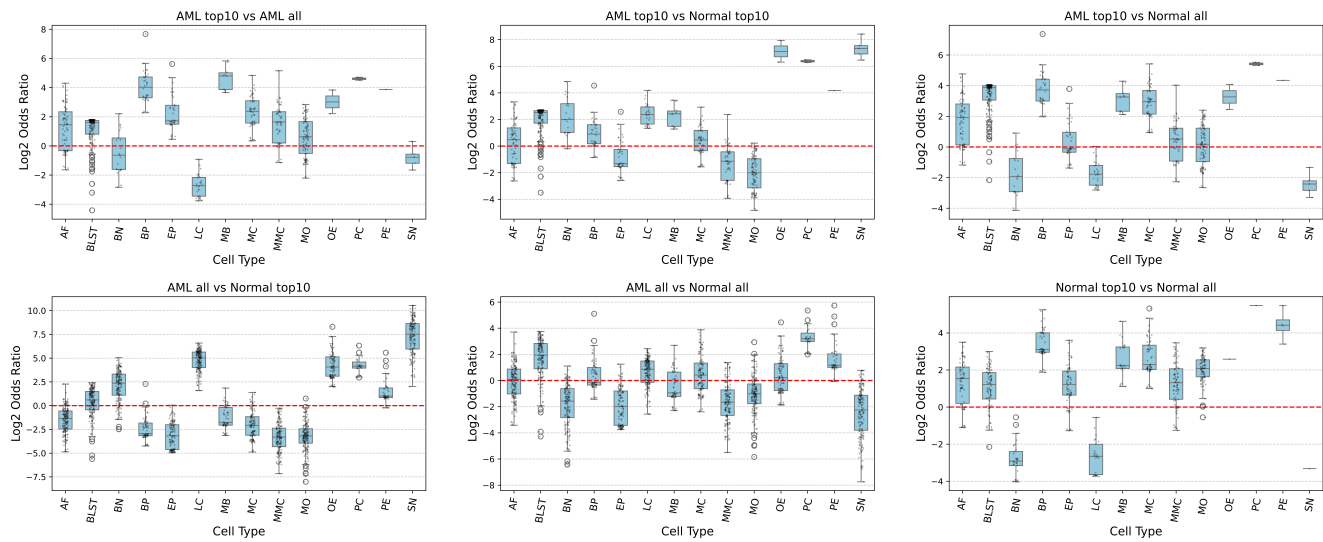

**Figure Supplementary 4. Comparative Log odds ratios** In each plot we are comparing the mean differentials of the patients taken just from the the two differential types and plotting the log odds ratios of the two.



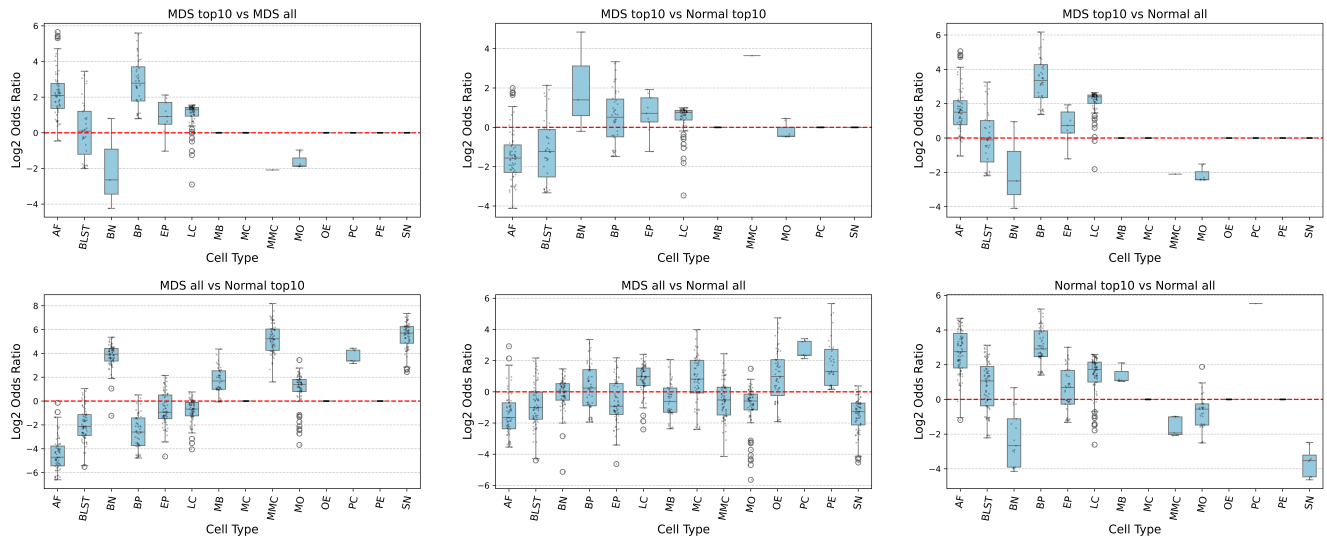

**Figure Supplementary 5. Comparative Log odds ratios** In each plot we are comparing the mean differentials of the patients taken just from the the two differential types and plotting the log odds ratios of the two.

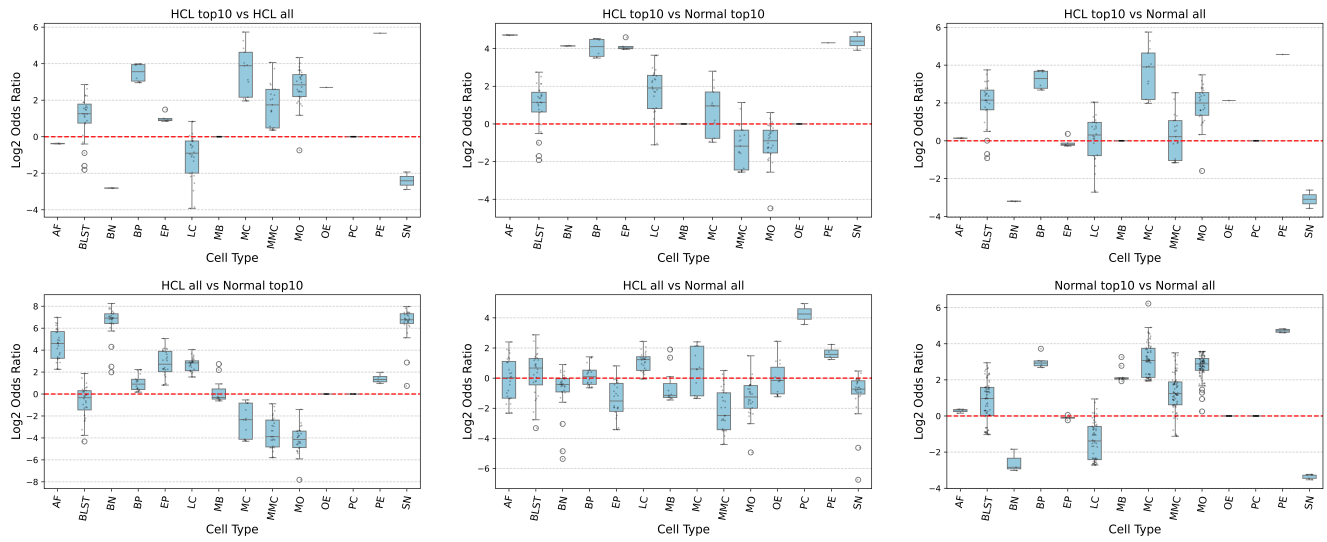

**Figure Supplementary 6. Comparative Log odds ratios** In each plot we are comparing the mean differentials of the patients taken just from the the two differential types and plotting the log odds ratios of the two.

## Myelodysplastic Syndromes

**Highest Attention Cells:** The model identifies dysplastic mono-lobated, agranular neutrophils and circulating immature granulocytes, along with dysplastic erythroid cells showing nuclear-cytoplasmic asynchrony.

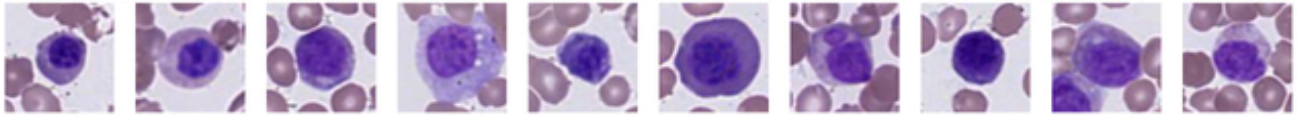

**Randomly Selected Cells:** Randomly sampled cells sample show the degree of dysplasia in this patient.

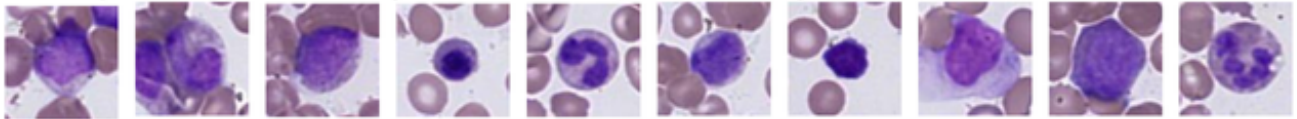

**Lowest Attention Cells:** Low attention cells include neutrophils, blasts, lymphocytes and monocytes.

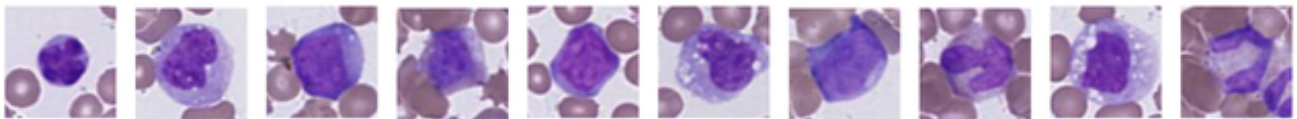

**Figure Supplementary 7. MDS Attention Panel** High-attention cells include dysplastic hypogranular neutrophils, monolobated neutrophils, dysplastic erythroblasts showing nuclear-cytoplasmic dyssynchrony, and abnormal immature granulocytes circulating in peripheral blood.

**Table Supplementary 1. Different cytometry-based ML classifiers and their hyperparameters**

| Classifiers             | Hyperparameters     | Values                      |
|-------------------------|---------------------|-----------------------------|
| SVC                     | kernel              | rbf (radial basis function) |
|                         | error (c)           | [5,10, 20, 50, 100, 200]    |
|                         | Decision Functions  | OvO, OvR                    |
| Random Forest           | n_estimators        | range(100,300,30)           |
|                         | max_depth           | [6,8,10,12]                 |
|                         | min_sample_split    | [4,6,8,10]                  |
| Logistic Regression     | Objective Function  | [newton_cg, liblinear]      |
|                         | C                   | [1,10,20,30]                |
| Multinomial Naive Bayes | $\alpha$            | [0.1,1,10]                  |
|                         | Prior Probabilities | [True, False]               |
| XG Boost                | n_estimators        | range(90,160,20)            |
|                         | max_depth           | range(3,8,1)                |
|                         | learning rate       | [0.02,0.05]                 |
|                         | $\gamma$            | [0.05,0.1,0.2]              |
|                         | Objective Function  | softmax                     |
| Multi-Layer Perceptron  | Activation Function | Relu                        |
|                         | Optimizer           | Adam                        |
|                         | Hidden Layers       | (32,64,32)                  |

**Table Supplementary 2. Hyperparameters for MIL models training**

| Hyperparameters               | Values                     |
|-------------------------------|----------------------------|
| Learning Rate                 | 1e-4                       |
| Epochs                        | 300                        |
| Learning Rate Scheduler       | CyclicLR, mode=triangular2 |
| Loss Function                 | Cross Entropy Loss         |
| Batch Size                    | 16                         |
| Optimizer                     | Adagrad                    |
| Train, Validation, Test Split | 0.55, 0.2, 0.25            |
| GPUs                          | 3 (RTX 3090 each)          |

[b]

(A)

| Diagnosis                 | Number of Patients |
|---------------------------|--------------------|
| Acute Leukemia            | 307                |
| Normal                    | 130                |
| Myelodysplastic syndromes | 95                 |
| Hairy Cell Leukemia       | 41                 |

[b]

(B)

$$\begin{array}{ll}
 \text{Standard Deviation} & \text{Mean} \\
 g(\{p_j\}) = \sqrt{\frac{1}{|j|} \sum_j (p_j - \bar{p})^2} & g(\{p_j\}) = \frac{1}{|j|} \sum_j p_j \\
 \text{Generalized Mean} & \text{Log Sum Exponentiation} \\
 g(\{p_j\}) = \left( \frac{1}{|j|} \sum_j p_j^r \right)^{\frac{1}{r}} & g(\{p_j\}) = \frac{1}{r} \log \left( \frac{1}{|j|} \sum_j e^{r \cdot p_j} \right)
 \end{array}$$

[b]

(C)

| Aggregation group | Aggregation function                            |
|-------------------|-------------------------------------------------|
| Normal            | Mean, Standard Deviation, Max, Min              |
| GM                | Generalized mean with $r = 1.0, 2.5$ and $5.0$  |
| LSE               | Log Sum Exponentiation with $r = 2.5$ and $5.0$ |

**Figure Supplementary 8. Combined tables of analysis.** (A) Patient cohort by diagnosis. (B) Aggregation functions used in the analysis. (C) Summary of aggregation function experiments. Three groups of functions were experimented with for aggregation of cell embeddings. The performance difference across the different groups was negligible and attributed to stochasticity.

**Table Supplementary 3. Table of experiments:** Summary of diagnostic experiments

| Experiments | Description                                                                                           |
|-------------|-------------------------------------------------------------------------------------------------------|
| AL vs NL    | Binary classifier of acute leukemia vs normal                                                         |
| MDS vs NL   | Binary classifier of myelodysplastic syndromes vs normal                                              |
| HCL vs NL   | Binary classifier of hairy cell leukemia                                                              |
| Multiclass  | 4-way classification between acute leukemia, myelodysplastic syndrome, hairy cell leukemia and normal |

(A)

| Model Name                     | Description                                                                                                                                                                                                        |
|--------------------------------|--------------------------------------------------------------------------------------------------------------------------------------------------------------------------------------------------------------------|
| Cytometry-Based ML Classifiers | The DeepHeme classifier sorts the cells into respective classes to create a cytometric vector of the relative proportion of each cell class. This vector is used to train ML classifiers to predict the diagnosis. |
| Gated MIL - ImageNet           | The cell embeddings are created from an ImageNet-trained model and passed to Gated MIL for predictions.                                                                                                            |
| CAREMIL - ImageNet             | The cell embeddings are created from an ImageNet-trained model and passed to CAREMIL for predictions.                                                                                                              |
| Gated MIL - Deep Heme          | The cell embeddings from the DeepHeme model are passed to the Gated MIL model for predictions.                                                                                                                     |
| CAREMIL - Deep Heme            | The cell embeddings from the DeepHeme model are passed to the CAREMIL model for predictions.                                                                                                                       |
| Gated MIL - UNI2-h             | The cell embeddings from the UNI2-h model and passed to Gated MIL for predictions.                                                                                                                                 |
| CAREMIL - UNI2-h               | The cell embeddings from the UNI2-h model and passed to CAREMIL for predictions.                                                                                                                                   |
| Gated MIL - Virchow2           | The cell embeddings from the Virchow2 model are passed to the Gated MIL model for predictions.                                                                                                                     |
| CAREMIL - Virchow2             | The cell embeddings from the Virchow2 model are passed to the CAREMIL model for predictions.                                                                                                                       |

**Table Supplementary 4. Overview of Model Architectures and Performances. Model Architectures:** A summary description of each model architecture used in the study.

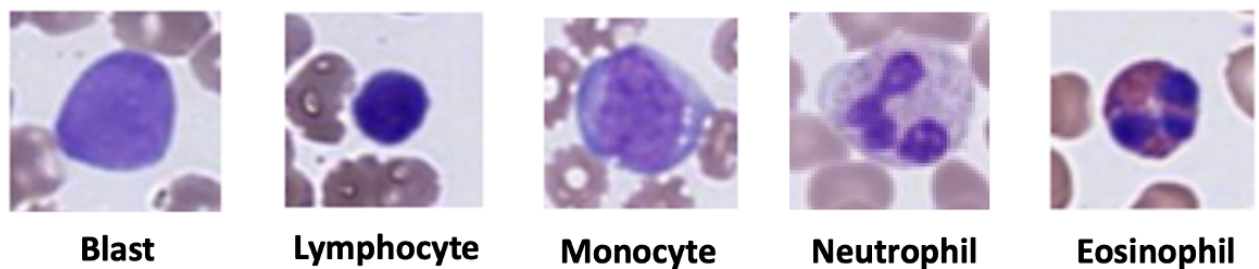

**Figure Supplementary 9. Cell types seen in the blood.** Five prototypical cell types seen in peripheral blood smears are shown. Blasts are stem-cell-like cells that are increased in number in acute myeloid and lymphoid leukemias. The purple nucleus makes up nearly the entire cell (high nuclear:cytoplasmic ratio). The nuclear chromatin is fine, and small circles (nucleoli) can be seen within it. The cell is relatively large with almost no visible blue cytoplasm. Lymphocytes have darker, more mature nuclear chromatin. Monocytes have visible folds in the nucleus and spongy chromatin, blue-gray cytoplasm, and sometimes visible white vacuoles in the cytoplasm. Neutrophils and eosinophils have segmented nuclei. The eosinophil is notable for its bright pink cytoplasm.



## AML

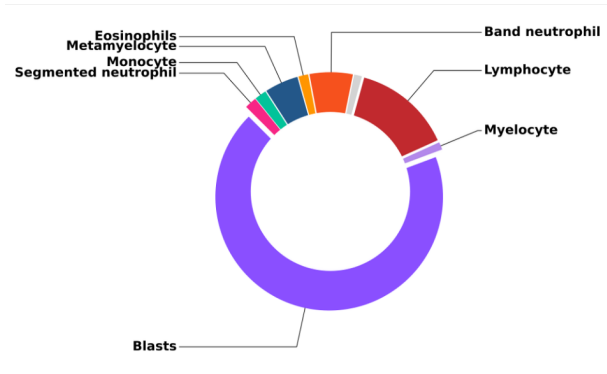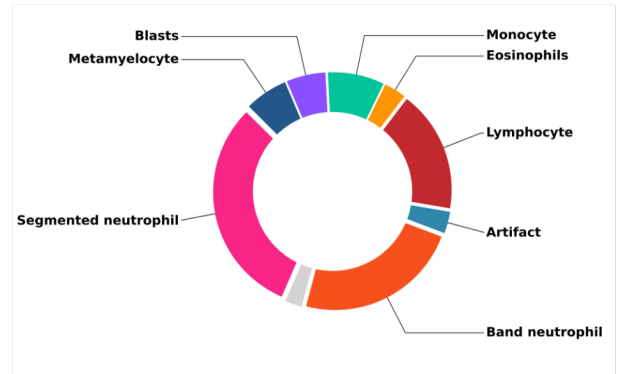

## MDS

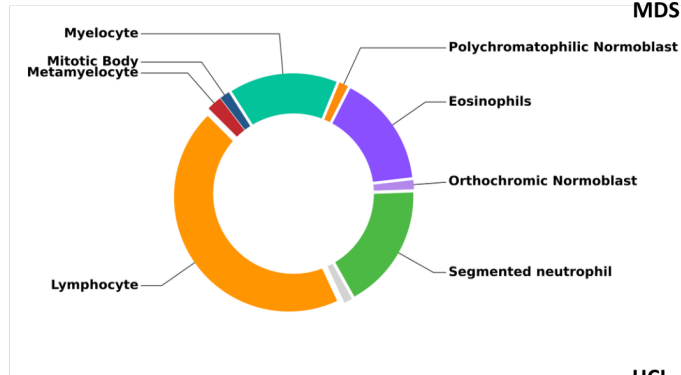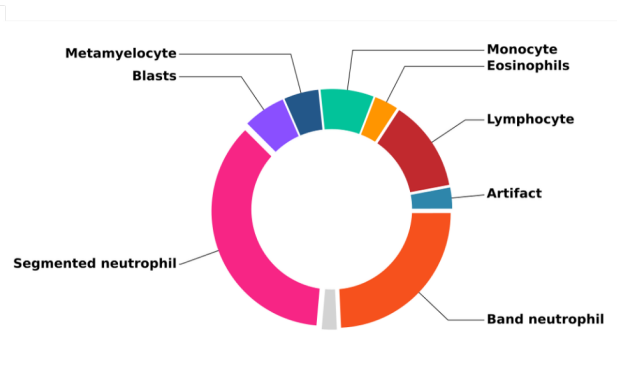

## HCL

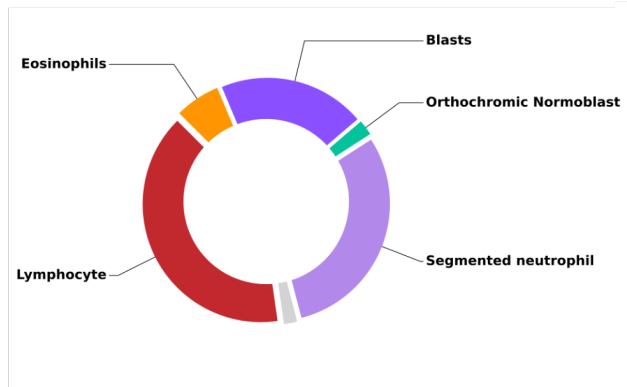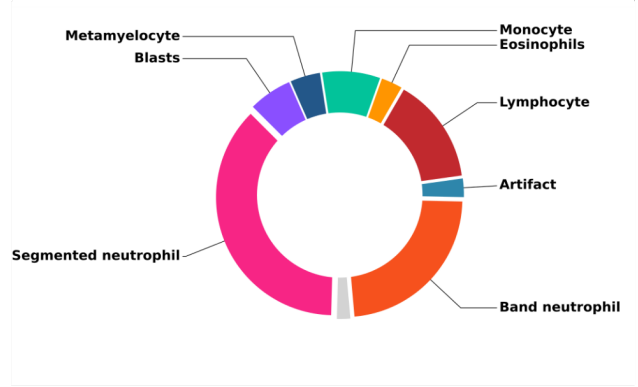

Figure Supplementary 10. <Greg>

(B)

| Model Type - Encoder           | AML vs NL                           | MDS vs NL                           | HCL vs NL                           | Multiclass                          |
|--------------------------------|-------------------------------------|-------------------------------------|-------------------------------------|-------------------------------------|
| Cytometry-Based ML Classifiers | 0.991 $\pm$ 0.00                    | 0.877 $\pm$ 0.00                    | 0.714 $\pm$ 0.00                    | 0.892 $\pm$ 0.000                   |
| CAREMIL - Deep Heme            | <b>0.999 <math>\pm</math> 0.002</b> | 0.891 $\pm$ 0.024                   | <b>0.945 <math>\pm</math> 0.029</b> | 0.916 $\pm$ 0.027                   |
| CAREMIL - Imagenet             | 0.750 $\pm$ 0.040                   | 0.863 $\pm$ 0.066                   | 0.627 $\pm$ 0.089                   | 0.802 $\pm$ 0.046                   |
| CAREMIL - UNI2-h               | 0.884 $\pm$ 0.017                   | <b>0.896 <math>\pm</math> 0.009</b> | 0.917 $\pm$ 0.004                   | <b>0.923 <math>\pm</math> 0.023</b> |
| CAREMIL - Virchow2             | 0.923 $\pm$ 0.016                   | 0.758 $\pm$ 0.026                   | 0.859 $\pm$ 0.014                   | 0.873 $\pm$ 0.019                   |
| Gated MIL - Deep Heme          | 0.957 $\pm$ 0.010                   | 0.829 $\pm$ 0.064                   | 0.878 $\pm$ 0.019                   | 0.919 $\pm$ 0.016                   |
| Gated MIL - Imagenet           | 0.770 $\pm$ 0.073                   | 0.787 $\pm$ 0.066                   | 0.616 $\pm$ 0.097                   | 0.599 $\pm$ 0.062                   |
| Gated MIL - UNI2-h             | 0.773 $\pm$ 0.062                   | 0.816 $\pm$ 0.088                   | 0.715 $\pm$ 0.034                   | 0.819 $\pm$ 0.033                   |
| Gated MIL - Virchow2           | 0.866 $\pm$ 0.005                   | 0.823 $\pm$ 0.036                   | 0.672 $\pm$ 0.038                   | 0.806 $\pm$ 0.012                   |

**Table Supplementary 5. Model Performance:** AUROC scores with standard deviations for each model architecture across diagnostic experiments. The highest-performing models for each experiment are highlighted in bold.
